# Supplementary material for: Perception and Experiences of the Front Line Health Workers (FLWs) Attending Suspected or Confirmed Covid-19 Patients in Bangladesh: a Cross-sectional Study
Source: Research Square preprint supplement (doi:10.21203/rs.3.rs-576319/v1), 2021-06-01
Supplement: Supplementary file 1 [file a8550ff49582b2bea79c4862.docx]

**Annex 2: Comparison between doctors and other FLWs (Follow up round)**

|  | **Types of health care professional %(n)** | | |
| --- | --- | --- | --- |
| **Doctors** | **Other staffs*** | **All** |
| **No. of respondents** | **18** | **28** | **46** |
| **Received any training regarding management of COVID19 in last 3-4 weeks** | | | |
| Yes | 5.6 (1) | 10.7 (3) | 8.7 (4) |
| No | 94.4 (17) | 89.3 (25) | 91.3 (42) |
| **Received any training regarding PPE in last 3-4 weeks** | | | |
| Yes | 11.1 (2) | 25.0 (7) | 19.6 (9) |
| No | 88.9 (16) | 75.0 (21) | 80.4 (37) |
| **Received any new PPE/other protective equipment within this time period** | | | |
| Yes | 83.3 (15) | 71.4 (20) | 76.1 (35) |
| No | 16.7 (3) | 28.6 (8) | 23.9 (11) |
| **Content with the quality of newly supplied PPE/other protective equipment** | | | |
| Yes | 61.1 (11) | 53.6 (15) | 56.5 (26) |
| No | 22.2 (4) | 17.9 (5) | 19.6 (9) |
| Didn't get any PPE | 16.7 (3) | 28.6 (8) | 23.9 (11) |
| **Any change in your duty roaster within last 3-4 weeks** | | | |
| Yes | 66.7 (12) | 28.6 (8) | 43.5 (20) |
| No | 33.3 (6) | 53.6 (15) | 45.7 (21) |
| I don't have any duty roster |  | 17.9 (5) | 10.9 (5) |
| **Satisfied to work by this roaster** | | | |
| Yes | 72.2 (13) | 25.0 (7) | 43.5 (20) |
| No | 27.8 (5) | 3.57 (1) | 2.2 (1) |
| Not applicable | - | 71.4 (20) | 54.4 (25) |
| **Arrangement for your accommodation for after duty/quarantine period** | | | |
| Yes | 44.4 (8) | 10.7 (3) | 23.9 (11) |
| No | 50.0 (9) | 46.4 (13) | 47.8 (22) |
| Not applicable | 5.6 (1) | 42.9 (12) | 28.3 (13) |
| **Food is being managed by the authority properly now** | | | |
| Yes | 44.4 (8) | 10.7 (3) | 23.9 (11) |
| No | 50.0 (9) | 46.4 (12) | 45.7 (21) |
| Not applicable | 5.6 (1) | 42.9 (13) | 30.4 (14) |
| **Transport to and from the accommodation is being managed by the authority properly now** | | | |
| Yes | 66.7 (12) | 3.6 (1) | 28.3 (13) |
| No | 27.8 (5) | 46.4 (13) | 39.1 (18) |
| Not applicable | 5.6 (1) | 50 (14) | 32.6 (15) |
| **Improvement in your mental health within last 1 month considering above mentioned initiatives** | | | |
| Yes | 33.3 (6) | 42.9 (12) | 39.1 (18) |
| No | 66.7 (12) | 57.1 (16) | 60.9 (28) |

*nurse/midwives, paramedics
